# Supplementary material for: 3D PtAu nanoframe superstructure as a high-performance carbon-free electrocatalyst
Source: Royal Society of Chemistry journal article supplement (doi:10.1039/c8nr08231f), 2019-01-01
Supplement: c8nr08231f1.pdf [file c8nr08231f1.pdf]

Supporting information for

## **3D PtAu Nanoframe Superstructure as High-Performance Carbon-Free Electrocatalyst**

Sungjae Yoo<sup>a</sup>, Sanghyun Cho<sup>a</sup>, Dajeong Kim<sup>a</sup>, Seongkeun Ih<sup>a</sup>, Sungwoo Lee<sup>a</sup>, Liqiu Zhang<sup>a,b</sup>, Hao Li<sup>a</sup>, Jin Yong Lee<sup>a</sup>, Lichun Liu<sup>\*b</sup> and Sungho Park<sup>\*a</sup>

<sup>a</sup>Department of Chemistry and, Sungkyunkwan University, Suwon 440-746, South Korea.

<sup>b</sup>College of Biological, Chemical Sciences and Engineering, Jiaxing University, Jiaxing, 314001, People's Republic of China.

\*email: spark72@skku.edu, lichun.liu@mail.zjxu.edu.cn

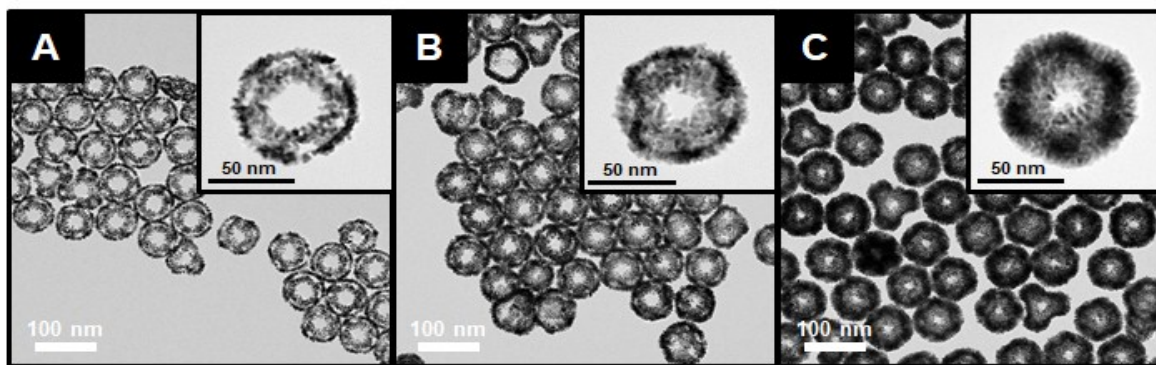

**Figure S1** SEM image of TOh PtAu NFs with different thickness. Thickness can be controlled by controlling the amount of H<sub>2</sub>PtCl<sub>6</sub> precursor: (A) 11 μM, (B) 22 μM , (C) 44 μM

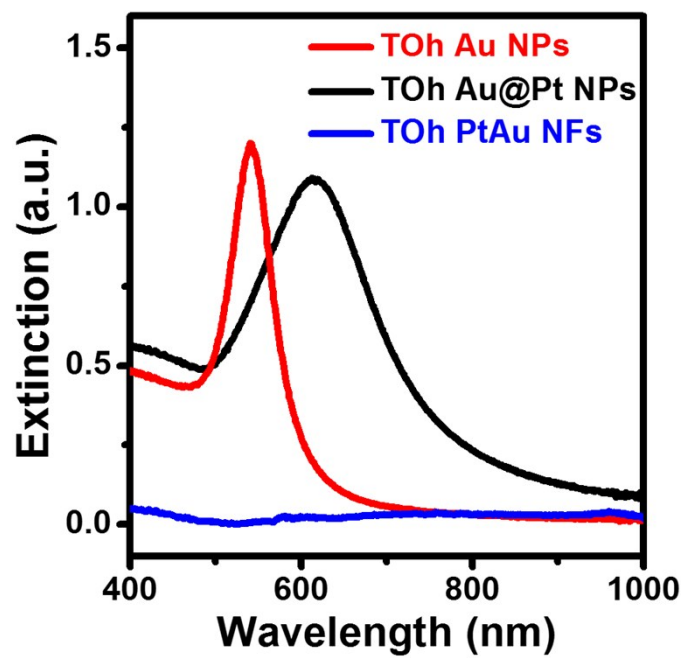

**Figure S2** UV-Vis spectra of TOh Au NPs (red trace), TOh Au@Pt NPs (black trace), TOh PtAu NFs (blue trace).

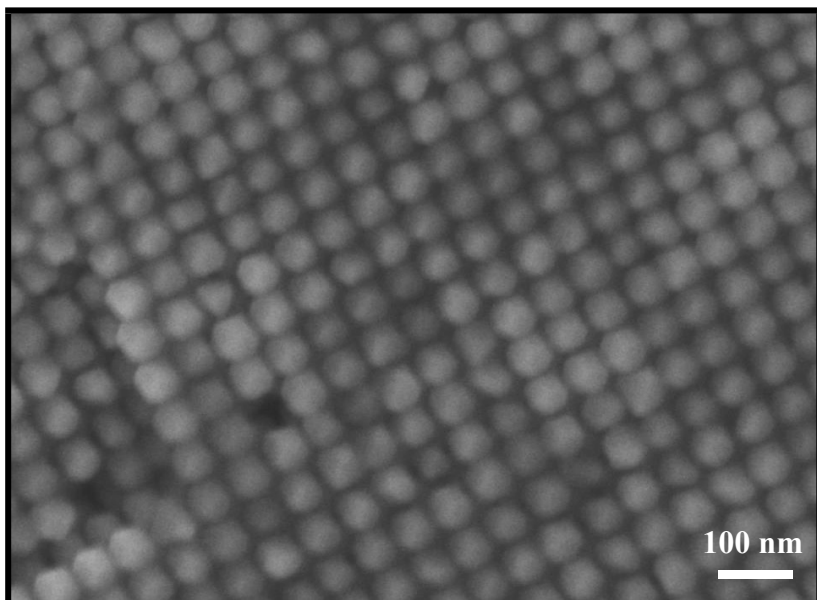

**Figure S3** SEM image of self-assembled ordered TOh Au NPs with uniform shape and size.

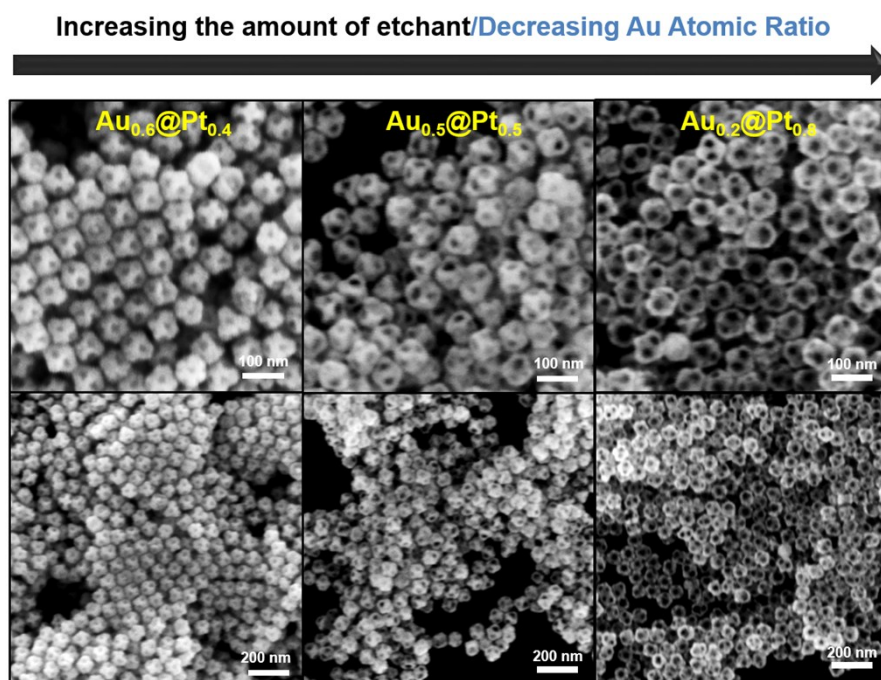

**Figure S4** Controlling atomic ratio of PtAu NFs by changing etchant concentration. Bottom figure of each column shows low magnification and top figure shows high magnification of PtAu NFs.

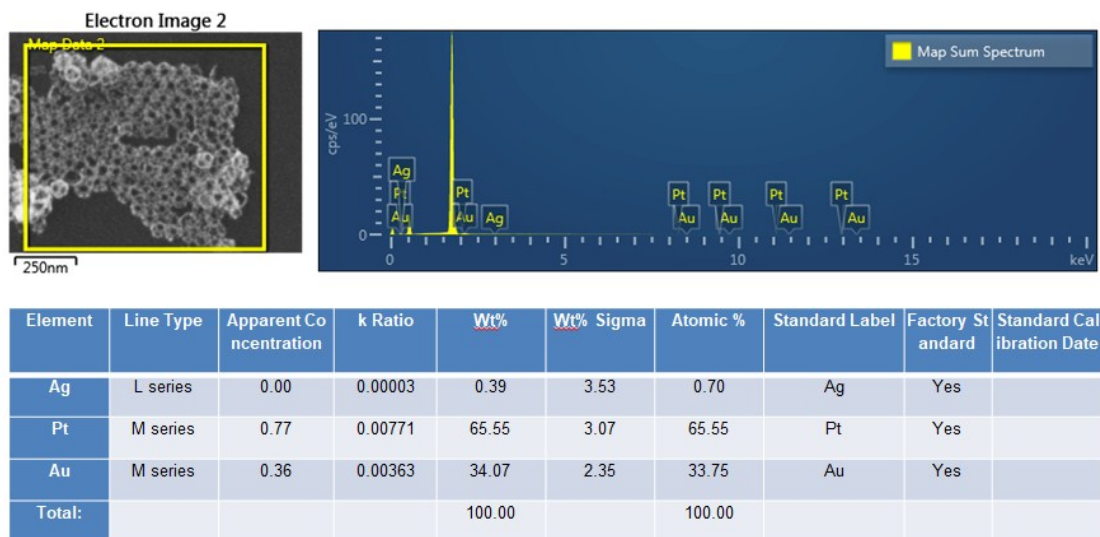

**Figure S5** EDS mapping for compositional analysis of a typical TOh PtAu NFs

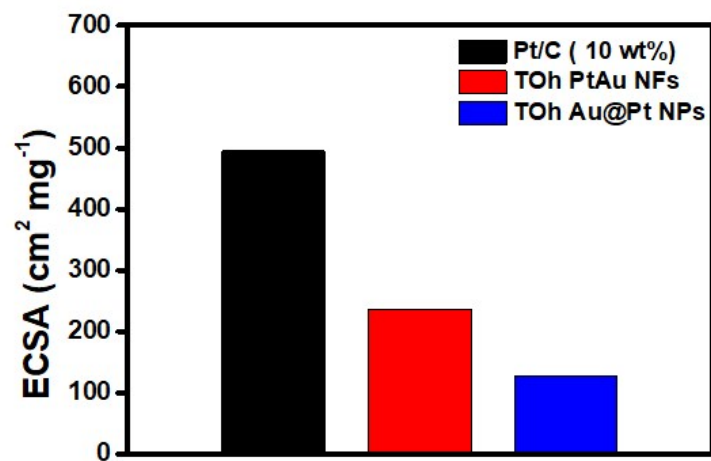

**Figure S6** ECSA of Pt/C, TOh Au@Pt solid NPs and TOh PtAu NFs.

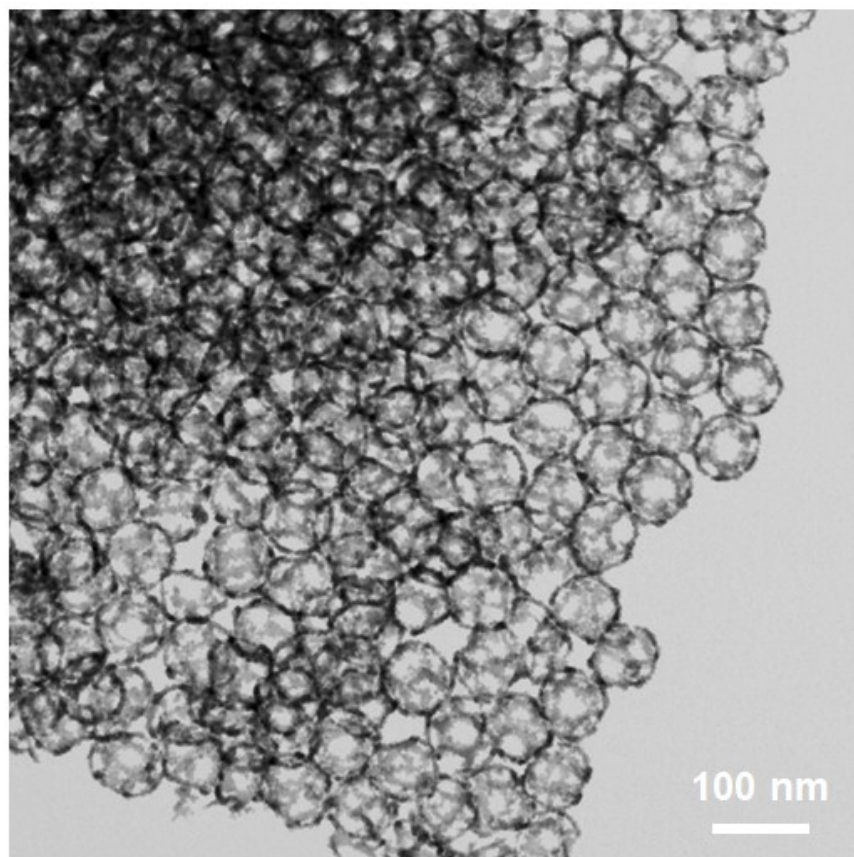

**Figure S7** TEM image of PtAu NFs after 800 cycles in 0.1 M  $\text{H}_2\text{SO}_4$

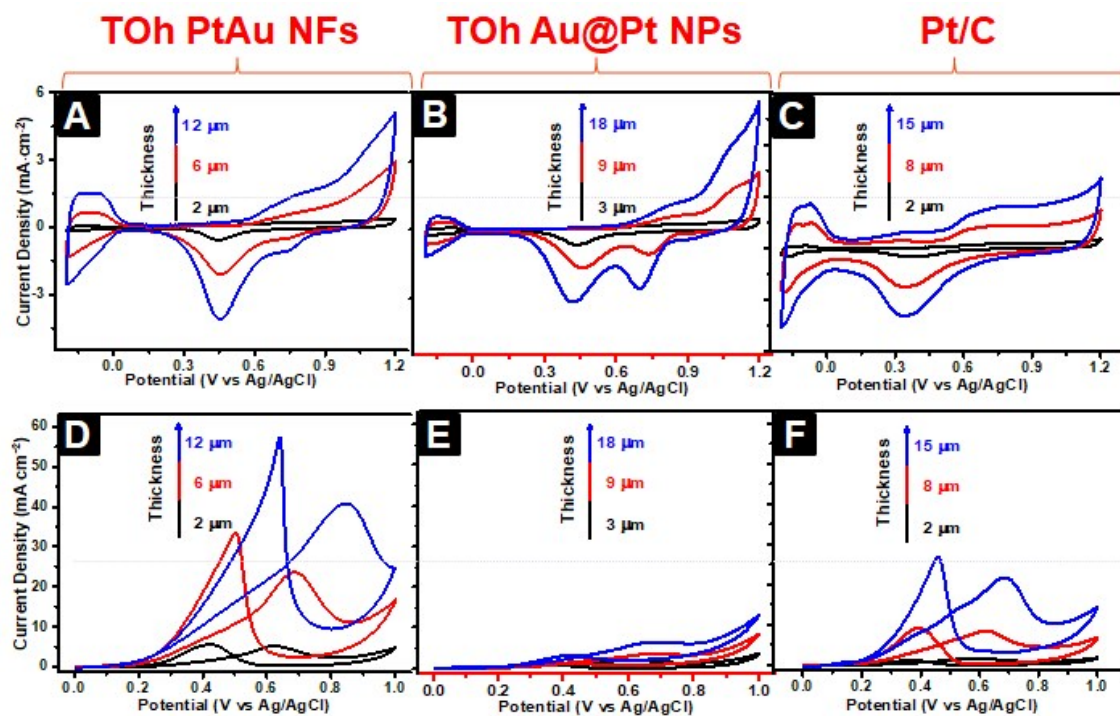

**Figure S8** Catalytic performance of TOh NFs (A,D), TOh Au@Pt NPs (B,E) and Pt/C (C,F) with different film thicknesses as-shown in Figure S8. Cyclic voltammogram was carried out using in 0.1 M  $\text{H}_2\text{SO}_4$  (A,B and C), MOR using 1 M Methanol in 0.1 M  $\text{H}_2\text{SO}_4$  (D,E and F), respectively.

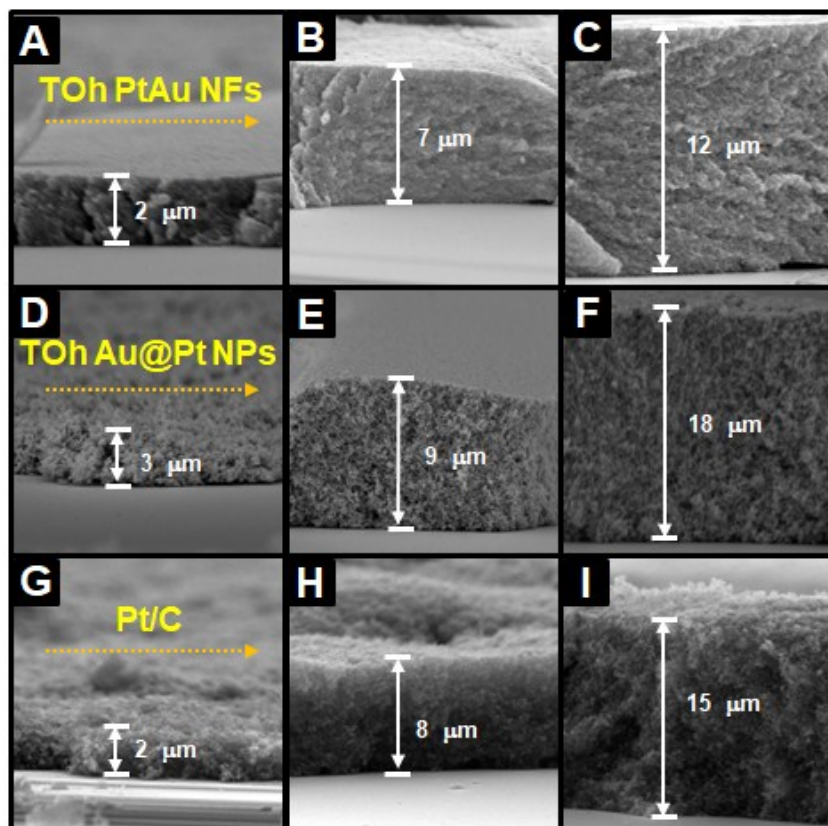

**Figure S9** SEM images of TOh PtAu NFs (A-C), TOh Au@Pt NPs (D-F), and Pt/C (G-I) with different thicknesses.
